# Supplementary material
Source: MDPI journal article supplement (https://www.mdpi.com/2410-3888/8/3/145)
Supplement: s1 [file s1]

Comparative transcriptome analysis identifies MAPK signaling pathway associated with regulating ovarian lipid metabolism during vitellogenesis in the mud crab, *Scylla paramamosain*

**Table S1.** Specific primers used in qRT-PCR.

| Gene ID       | Gene information                     | Forward Sequence (5'-3') | Reverse Sequence (5'-3') | Length |
|---------------|--------------------------------------|--------------------------|--------------------------|--------|
| Gene 1        | Uncharacterized protein K02A2.6-like | CCACGACACCCATGTTGGTA     | GGCATGGTCAACGCGTATTC     | 208bp  |
| Gene 2        | Catenin-like                         | GACCAGCTAGTCACCACCAC     | TCTCCGAAGTATGCAGTGCC     | 185bp  |
| Gene 3        | Aggrecan core protein-like           | AGAGAAGTGGTTCAGGCAGC     | CCCATTCCCTCGTCATTGCT     | 110bp  |
| Gene 4        | Serine proteinase                    | GGCTGCAGGCATACATTGAC     | AAGGTGCTGCCTACATGCTT     | 229bp  |
| Gene 5        | Proclotting enzyme-like              | TGGACCAACGAAGAATGCGA     | GTACACTCCGGGGTTTCCTG     | 210bp  |
| Gene 6        | Glucose transporter type-1 like      | AGGCAGCCAAGGAGGAGATA     | GACTGACTGGGGTGCATTGA     | 191bp  |
| <i>Sp-Vg</i>  | Vitellogenin                         | CGCAACCGCCACTGAAGAT      | CCACCATGCTGCTCACGACT     | 204bp  |
| <i>Sp-VgR</i> | Vitellogenin receptor                | TTCTATACCAGGCCACTACC     | TTTTCACTCCAAGCACACTC     | 252bp  |

**Table S2.** Raw data statistics table.

| sample | Raw reads | Error rate (%) | Q30 (%) | GC content (%) |
|--------|-----------|----------------|---------|----------------|
| F_OV_1 | 50353638  | 0.0281         | 91.83   | 51.18          |
| F_OV_2 | 59437014  | 0.0277         | 92.18   | 50.34          |
| F_OV_3 | 52707876  | 0.0273         | 92.58   | 52.59          |
| F_OV_4 | 56660064  | 0.0272         | 92.62   | 52.49          |
| F_OV_5 | 53567568  | 0.0277         | 92.24   | 52.61          |
| S_OV_3 | 63795672  | 0.028          | 92.01   | 52.67          |
| S_OV_4 | 63846232  | 0.0275         | 92.33   | 51.86          |
| S_OV_5 | 54671914  | 0.0281         | 91.92   | 50.53          |

**Table S3.** Clean data statistics table.

| sample | Raw reads | Error rate (%) | Q30 (%) | GC content (%) |
|--------|-----------|----------------|---------|----------------|
| F_OV_1 | 48538534  | 0.026          | 93.34   | 51.09          |
| F_OV_2 | 57552348  | 0.0257         | 93.63   | 50.18          |

|        |          |        |       |       |
|--------|----------|--------|-------|-------|
| F_OV_3 | 50772654 | 0.0251 | 94.2  | 52.56 |
| F_OV_4 | 54877354 | 0.0251 | 94.13 | 52.38 |
| F_OV_5 | 51673648 | 0.0254 | 93.9  | 52.43 |
| S_OV_3 | 61434276 | 0.0256 | 93.7  | 52.5  |
| S_OV_4 | 61793014 | 0.0254 | 93.86 | 51.62 |
| S_OV_5 | 52576372 | 0.0257 | 93.65 | 50.23 |

**Table S4.** Information of eggNOG functional categories.

| Type                               | Functional Categories                                             | COG   |
|------------------------------------|-------------------------------------------------------------------|-------|
| INFORMATION STORAGE AND PROCESSING | [A] RNA processing and modification                               | 169   |
| INFORMATION STORAGE AND PROCESSING | [B] Chromatin structure and dynamics                              | 126   |
| METABOLISM                         | [C] Energy production and conversion                              | 375   |
| CELLULAR PROCESSES AND SIGNALING   | [D] Cell cycle control, cell division, chromosome partitioning    | 239   |
| METABOLISM                         | [E] Amino acid transport and metabolism                           | 471   |
| METABOLISM                         | [F] Nucleotide transport and metabolism                           | 159   |
| METABOLISM                         | [G] Carbohydrate transport and metabolism                         | 580   |
| METABOLISM                         | [H] Coenzyme transport and metabolism                             | 135   |
| METABOLISM                         | [I] Lipid transport and metabolism                                | 336   |
| INFORMATION STORAGE AND PROCESSING | [J] Translation, ribosomal structure and biogenesis               | 880   |
| INFORMATION STORAGE AND PROCESSING | [K] Transcription                                                 | 747   |
| INFORMATION STORAGE AND PROCESSING | [L] Replication, recombination and repair                         | 732   |
| CELLULAR PROCESSES AND SIGNALING   | [M] Cell wall/membrane/envelope biogenesis                        | 104   |
| CELLULAR PROCESSES AND SIGNALING   | [N] Cell motility                                                 | 7     |
| CELLULAR PROCESSES AND SIGNALING   | [O] Posttranslational modification, protein turnover, chaperones  | 1675  |
| METABOLISM                         | [P] Inorganic ion transport and metabolism                        | 328   |
| METABOLISM                         | [Q] Secondary metabolites biosynthesis, transport and catabolism  | 166   |
| POORLY CHARACTERIZED               | [S] Function unknown                                              | 10996 |
| CELLULAR PROCESSES AND SIGNALING   | [T] Signal transduction mechanisms                                | 1049  |
| CELLULAR PROCESSES AND SIGNALING   | [U] Intracellular trafficking, secretion, and vesicular transport | 1419  |
| CELLULAR PROCESSES AND SIGNALING   | [V] Defense mechanisms                                            | 52    |

|                                  |                       |     |
|----------------------------------|-----------------------|-----|
| CELLULAR PROCESSES AND SIGNALING | [Y] Nuclear structure | 1   |
| CELLULAR PROCESSES AND SIGNALING | [Z] Cytoskeleton      | 696 |

**Table S5.** Information of functional proteins in PPI network.

| Protein ID | Description                                                                             |
|------------|-----------------------------------------------------------------------------------------|
| chic       | Chickadee, isoform e; Profilin.                                                         |
| puc        | Dual specificity phosphatase 10; Puckered, isoform A.                                   |
| Drk        | Protein enhancer of sevenless 2B.                                                       |
| msn        | Misshapen, isoform A; JUN kinase kinase kinase activity; ATP binding.                   |
| alph       | Alphabet, isoform E; Protein serine/threonine phosphatase activity.                     |
| lic        | MAP kinase kinase activity; protein kinase activity; ATP binding.                       |
| Dsor1      | Dual specificity mitogen-activated protein kinase kinase dSOR1.                         |
| Eip75B     | Nuclear receptor subfamily 1 group d member 3; Ecdysone-induced protein 75B, isoform B. |
| Tak1       | Mitogen-activated protein kinase kinase kinase 7.                                       |
| Raf        | Raf homolog serine/threonine-protein kinase phl.                                        |
| aop        | Ets DNA-binding protein pokkuri.                                                        |
| rl         | Mitogen-activated protein kinase ERK-A.                                                 |
| csw        | Tyrosine-protein phosphatase non-receptor type 11.                                      |
| CG2107     | Carnitine o-palmitoyltransferase 2; Carnitine O-palmitoyltransferase activity.          |
| Desat1     | Stearoyl-coa desaturase (delta-9 desaturase).                                           |
| v(2)k05816 | Fatty acid synthase, animal type.                                                       |
| Btk29A     | Tyrosine-protein kinase Btk29A.                                                         |
| Eip78C     | Nuclear receptor subfamily 1 group d member 3; Ecdysone-induced protein 78C.            |
| gro        | Groucho, isoform e.                                                                     |
| ttk        | Protein tramtrack, alpha isoform.                                                       |
| EcR        | Ecdysone receptor.                                                                      |
| sty        | Protein sprouty homolog 2.                                                              |
| p38b       | Mitogen-activated protein kinase 14B.                                                   |
| Ilk        | Integrin linked kinase, isoform a.                                                      |
| Ubi-p5E    | Ubiquitin-5E, isoform A; Protein tag.                                                   |
| whd        | Carnitine O-palmitoyltransferase activity.                                              |
| Mtl        | Ras-related c3 botulinum toxin substrate 1; Mig-2-like GTPase Mtl.                      |

|        |                                                                                                   |
|--------|---------------------------------------------------------------------------------------------------|
| Traf6  | Tnf receptor-associated factor 6.                                                                 |
| edl    | ETS-domain lacking; Sequence-specific DNA binding; protein binding.                               |
| emb    | Exportin-1; Receptor for the leucine-rich nuclear export signal (NES).                            |
| fabp   | Fatty acid-binding protein 3.                                                                     |
| peb    | Ras-responsive element-binding protein 1.                                                         |
| Acs1   | Acyl-CoA synthetase long-chain, isoform J; Long-chain fatty acid-CoA ligase activity.             |
| usp    | Protein ultraspiracle; Receptor for ecdysone.                                                     |
| ksr    | Kinase suppressor of ras, isoform A; Protein kinase activity; ATP binding.                        |
| CG5009 | Probable peroxisomal acyl-coenzyme A oxidase 1.                                                   |
| bsk    | Mitogen-activated protein kinase 8/9/10 (c-jun n-terminal kinase).                                |
| dos    | Protein daughter of sevenless.                                                                    |
| Src42A | Src oncogene at 42a, isoform a; Tyrosine-protein kinase Src42A.                                   |
| CG3961 | Uncharacterized protein, isoform e; CG3961, isoform A; Long-chain fatty acid-CoA ligase activity. |

---
